# Supplementary material
Source: publisher site journal article supplement (https://www.dovepress.com/article/320221)
Supplement: Supplementary file 1 [file get_supplementary_file.php]

## Supplemental Material

**Supplemental Table 1 SCr (mg/dL) over 7 days, 30 days, and 1 year by DGF status**

| DGF status                                |                  | N                                           | Variable     | Mean         | Minimum, maximum | Median    | P25, P75 |          |
|-------------------------------------------|------------------|---------------------------------------------|--------------|--------------|------------------|-----------|----------|----------|
| Overall <sup>a</sup>                      |                  | 361                                         | Baseline SCr | 6.4          | 1.2, 15.6        | 6.2       | 4.8, 7.6 |          |
|                                           |                  | 361                                         | 7-Day avg    | 5.9          | 1.1, 14.0        | 5.8       | 4.5, 7.4 |          |
|                                           |                  | 361                                         | 30-Day avg   | 4.6          | 1.0, 10.0        | 4.6       | 3.1, 5.9 |          |
|                                           |                  | 361                                         | Year avg     | 3.2          | 1.0, 9.2         | 3.1       | 2.2, 4.0 |          |
| DGF:<br>Dialysis-<br>based<br>definition  | Yes <sup>b</sup> | 119                                         | Baseline SCr | 6.3          | 1.9, 13.4        | 6.1       | 5.0, 7.5 |          |
|                                           |                  | 119                                         | 7-Day avg    | 7.0          | 2.9, 12.0        | 6.5       | 5.7, 8.3 |          |
|                                           |                  | 119                                         | 30-Day avg   | 5.9          | 2.9, 9.9         | 5.7       | 4.8, 6.8 |          |
|                                           |                  | 119                                         | Year avg     | 4.2          | 1.8, 9.2         | 4.0       | 3.3, 5.0 |          |
|                                           | No               | 243                                         | Baseline SCr | 6.5          | 1.2, 15.6        | 6.2       | 4.7, 7.7 |          |
|                                           |                  | 243                                         | 7-Day avg    | 5.4          | 1.1, 14.0        | 5.2       | 3.6, 6.9 |          |
|                                           |                  | 243                                         | 30-Day avg   | 3.9          | 1.0, 10.0        | 3.8       | 2.6, 5.0 |          |
|                                           |                  | 243                                         | Year avg     | 2.8          | 1.0, 7.0         | 2.6       | 1.9, 3.3 |          |
| Functional<br>DGF:<br>7-day<br>definition | Yes <sup>c</sup> | 217                                         | Baseline SCr | 6.1          | 1.2, 12.1        | 5.8       | 4.7, 7.3 |          |
|                                           |                  | 217                                         | 7-Day avg    | 6.9          | 2.1, 12.0        | 6.6       | 5.6, 8.3 |          |
|                                           |                  | 217                                         | 30-Day avg   | 5.5          | 1.9, 9.9         | 5.4       | 4.4, 6.4 |          |
|                                           |                  | 217                                         | Year avg     | 3.8          | 1.7, 9.2         | 3.6       | 3.0, 4.4 |          |
|                                           | No               | Intermediate<br>graft function <sup>d</sup> | 85           | Baseline SCr | 6.6              | 2.1, 15.6 | 6.3      | 4.4, 7.7 |
|                                           |                  |                                             | 85           | 7-Day avg    | 4.8              | 1.1, 14.0 | 4.8      | 3.0, 5.8 |
|                                           |                  |                                             | 85           | 30-Day avg   | 3.4              | 1.0, 10.0 | 3.1      | 2.2, 4.2 |
|                                           |                  |                                             | 85           | Year avg     | 2.5              | 1.0, 5.9  | 2.3      | 1.9, 2.9 |
|                                           |                  | Immediate graft<br>function <sup>e</sup>    | 37           | Baseline SCr | 7.7              | 3.8, 13.8 | 7.4      | 5.7, 8.8 |
|                                           |                  |                                             | 37           | 7-Day avg    | 3.4              | 1.3, 8.6  | 3.1      | 2.3, 4.6 |
|                                           |                  |                                             | 37           | 30-Day avg   | 2.4              | 1.1, 5.3  | 2.2      | 1.7, 3.0 |
|                                           |                  |                                             | 37           | Year avg     | 1.8              | 1.0, 3.2  | 1.7      | 1.4, 2.1 |
| Not defined <sup>f</sup>                  | 23               | Baseline SCr                                | 7.1          | 3.6, 13.4    | 7.0              | 5.5, 8.0  |          |          |
|                                           | 23               | 7-Day avg                                   | 5.3          | 2.9, 10.7    | 5.1              | 4.3, 5.7  |          |          |
|                                           | 23               | 30-Day avg                                  | 4.0          | 2.5, 8.4     | 3.8              | 2.9, 4.3  |          |          |
|                                           | 23               | Year avg                                    | 2.8          | 1.8, 6.1     | 2.6              | 2.1, 2.9  |          |          |

**Notes:** <sup>a</sup> One patient had primary graft non-function. <sup>b</sup> Requirement for dialysis in first 7 days post-transplantation, excluding requirement for dialysis due to hyperpotassiumemia within the first 24 hours postoperatively. <sup>c</sup> <30% reduction in baseline SCr in the first 7 days with or without dialysis. <sup>d</sup> 30% to 70% reduction in baseline SCr in the first 7 days without dialysis. <sup>e</sup> >70% reduction in Baseline SCr during the first 7 days without dialysis. <sup>f</sup> Had dialysis within 3 days and SCr drop >10%, or dialysis within 7 days and SCr drop >30%.

**Abbreviations:** Avg, average; DGF, delayed graft function; SCr, serum creatinine; P25, P75, 25th percentile, 75th percentile.

**Supplemental Table 2 Change from baseline in AUC<sub>scr</sub> (mg/dL.days) by DGF status 7 days and 30 days post-transplantation**

|        | Clinical DGF upon chart review <sup>a</sup> | N <sup>b</sup> | Geometric mean | 95% CI       | Median | Minimum, maximum | P25, P75     |
|--------|---------------------------------------------|----------------|----------------|--------------|--------|------------------|--------------|
| Day 7  | Yes                                         | 122            | 46.0           | 43.9, 48.1   | 45.5   | 21.1, 83.2       | 39.4, 53.0   |
|        | No                                          | 182            | 30.2           | 28.1, 32.4   | 32.9   | 7.1, 93.5        | 22.1, 40.8   |
| Day 30 | Yes                                         | 122            | 138.4          | 130.6, 146.7 | 137.2  | 61.6, 273.5      | 111.1, 176.2 |
|        | No                                          | 182            | 79.2           | 74.5, 84.2   | 79.9   | 29.3, 250.7      | 58.5, 109.6  |

**Notes:** <sup>a</sup> Based on physician chart review, including patients diagnosed with DGF with no documented dialysis event. <sup>b</sup> Data limited to patients with measurement on both 7 and 30 days. Baseline is the value right before transplant.

**Abbreviations:** AUC<sub>scr</sub>, serum creatinine area under the curve; CI, confidence interval; DGF, delayed graft function; P25, P75, 25th percentile, 75th percentile.

**Supplemental Table 3 SCr t<sub>1/2</sub> (days) by DGF status up to 7 days, 30 days, and 1 year post-transplantation**

|        | Clinical DGF upon chart review <sup>a</sup> | N <sup>b</sup> | Mean | 95% CI     | Median | Minimum, maximum | P25, P75  |
|--------|---------------------------------------------|----------------|------|------------|--------|------------------|-----------|
| Day 7  | Yes                                         | 5              | 2.3  | -0.8, 5.3  | 1.0    | 0.5, 6.3         | 0.6, 3.0  |
|        | No                                          | 88             | 2.8  | 2.4, 3.2   | 2.5    | 0.3, 6.7         | 1.3, 4.1  |
| Day 30 | Yes                                         | 95             | 9.8  | 8.9, 10.7  | 9.2    | 0.5, 21.2        | 6.8, 12.1 |
|        | No                                          | 189            | 7.4  | 6.6, 8.2   | 6.7    | 0.3, 28.9        | 3.0, 10.3 |
| 1 year | Yes                                         | 123            | 18.0 | 13.5, 22.5 | 11.4   | 0.5, 185.4       | 7.3, 17.1 |
|        | No                                          | 204            | 11.6 | 8.8, 14.4  | 7.1    | 0.3, 171.2       | 3.1, 12.3 |

**Notes:** <sup>a</sup> Based on physician chart review, including patients diagnosed with DGF with no documented dialysis event. <sup>b</sup> Limited to patients with SCr t<sub>1/2</sub> data.

**Abbreviations:** CI, confidence interval; DGF, delayed graft function; P25, P75, 25<sup>th</sup> percentile, 75<sup>th</sup> percentile; SCr t<sub>1/2</sub>, serum creatinine half-life.

**Supplemental Table 4 SCr category by DGF status at 7 days and 30 days post-transplantation**

| Time period | Last SCr post-transplantation (mg/dL) | Overall | Clinical DGF upon chart review <sup>a</sup> |            | Acute graft rejection event <sup>b</sup> |            | Mortality event |            |
|-------------|---------------------------------------|---------|---------------------------------------------|------------|------------------------------------------|------------|-----------------|------------|
|             |                                       |         | Yes n (%)                                   | No n (%)   | Yes n (%)                                | No n (%)   | Yes n (%)       | No n (%)   |
| 7 Days      | ≤2.5                                  | 67      | 0 (0.0)                                     | 67 (100.0) | 1 (1.5)                                  | 66 (98.5)  | 4 (1.5)         | 261 (97.4) |
|             | >2.5                                  | 295     | 148 (50.2)                                  | 147 (49.8) | 25 (8.5)                                 | 270 (91.5) | 2 (2.2)         | 88 (95.7)  |
| 30 Days     | ≤2.5                                  | 268     | 86 (32.1)                                   | 182 (67.9) | 12 (4.5)                                 | 256 (95.5) | 0 (0)           | 65 (97.0)  |
|             | >2.5                                  | 92      | 61 (66.3)                                   | 31 (33.7)  | 12 (13.0)                                | 80 (87.0)  | 6 (2.0)         | 286 (96.9) |

**Notes:** <sup>a</sup> Based on physician chart review, including patients diagnosed with DGF with no documented dialysis event. <sup>b</sup> Defined by documentation of a hyperacute or acute rejection episode while taking or after stopping immunosuppressive drug(s).

**Abbreviations:** DGF, delayed graft function; SCr, serum creatinine.

**Supplemental Table 5 SCr and dialysis events by DGF status 7 days post-transplantation**

| Clinical DGF upon chart review <sup>a</sup> | n (%)       | SCr (mg/dL) |                  |        |          | Dialysis events |                  |        |          |
|---------------------------------------------|-------------|-------------|------------------|--------|----------|-----------------|------------------|--------|----------|
|                                             |             | Mean SCr    | Minimum, maximum | Median | P25, P75 | Mean            | Minimum, maximum | Median | P25, P75 |
| Yes                                         | 148 (40.9)  | 7.1         | 2.9, 12.0        | 6.8    | 5.8, 8.4 | 2.3             | 0.0, 7.0         | 2.0    | 1.0, 3.0 |
| No                                          | 214 (59.1)  | 5.1         | 1.1, 14.0        | 5.0    | 3.4, 6.3 | 0.2             | 0.0, 2.0         | 0.0    | 0.0, 0.0 |
| Total                                       | 362 (100.0) | 5.9         | 1.1, 14.0        | 5.8    | 4.5, 7.4 | 1.1             | 0.0, 7.0         | 0.0    | 0.0, 2.0 |

**Notes:** <sup>a</sup>Based on physician chart review, including patients diagnosed with DGF with no documented dialysis event.

**Abbreviations:** DGF, delayed graft function; P25, P75, 25th percentile, 75th percentile; SCr, serum creatinine.

**Supplemental Table 6 Graft survival, acute rejection events, and dialysis independence by DGF status 7 days, 30 days, and 1 year post-transplant**

| Variable                                    | Overall<br>(N=362) | Clinical DGF upon chart review <sup>a</sup> |               |
|---------------------------------------------|--------------------|---------------------------------------------|---------------|
|                                             |                    | Yes<br>(N=148)                              | No<br>(N=214) |
| <b>Day 7</b>                                |                    |                                             |               |
| Graft survival, n (%)                       | 353 (97.5)         | 141 (95.3)                                  | 212 (99.1)    |
| Acute rejection events <sup>b</sup> , n (%) | 5 (1.4)            | 2 (1.4)                                     | 3 (1.4)       |
| Average graft survival (days), mean (SD)    | 6.8 (1.1)          | 6.7 (1.5)                                   | 6.9 (0.7)     |
| Dialysis independence <sup>c</sup> , n (%)  | 189 (52.2)         | 11 (7.4)                                    | 178 (83.2)    |
| <b>Day 30</b>                               |                    |                                             |               |
| Graft survival, n (%)                       | 353 (97.5)         | 141 (95.3)                                  | 212 (99.1)    |
| Acute rejection events <sup>b</sup> , n (%) | 5 (1.4)            | 2 (1.4)                                     | 3 (1.4)       |
| Average graft survival (days), mean (SD)    | 29.2 (4.8)         | 28.5 (6.5)                                  | 29.7 (2.9)    |
| Dialysis independence <sup>c</sup> , n (%)  | 187 (51.7)         | 9 (6.08)                                    | 178 (83.2)    |
| <b>1 Year</b>                               |                    |                                             |               |
| Graft survival, n (%)                       | 346 (95.6)         | 137 (92.6)                                  | 209 (97.7)    |
| Acute rejection events <sup>b</sup> , n (%) | 5 (1.4)            | 2 (1.4)                                     | 3 (1.4)       |
| Average graft survival (days), mean (SD)    | 344.9 (73.9)       | 332.8 (94.2)                                | 353.2 (54.5)  |
| Dialysis independence <sup>c</sup> , n (%)  | 186 (51.4)         | 8 (5.4)                                     | 178 (83.2)    |

**Notes:** <sup>a</sup> Based on physician chart review, including patients diagnosed with DGF with no documented dialysis event. <sup>b</sup> Listed by patient. By definition, each patient had 1 rejection episode. <sup>c</sup> Dialysis independence is defined as no dialysis from first day post-transplantation to the end of period.

**Abbreviations:** DGF, delayed graft function.

**Supplemental Figure 1 Mean AUC<sub>scr</sub> (mg/dL.hrs) at 7 days and 30 days post-transplant and mean AUC<sub>scr</sub> difference by clinical DGF status.<sup>a</sup>**

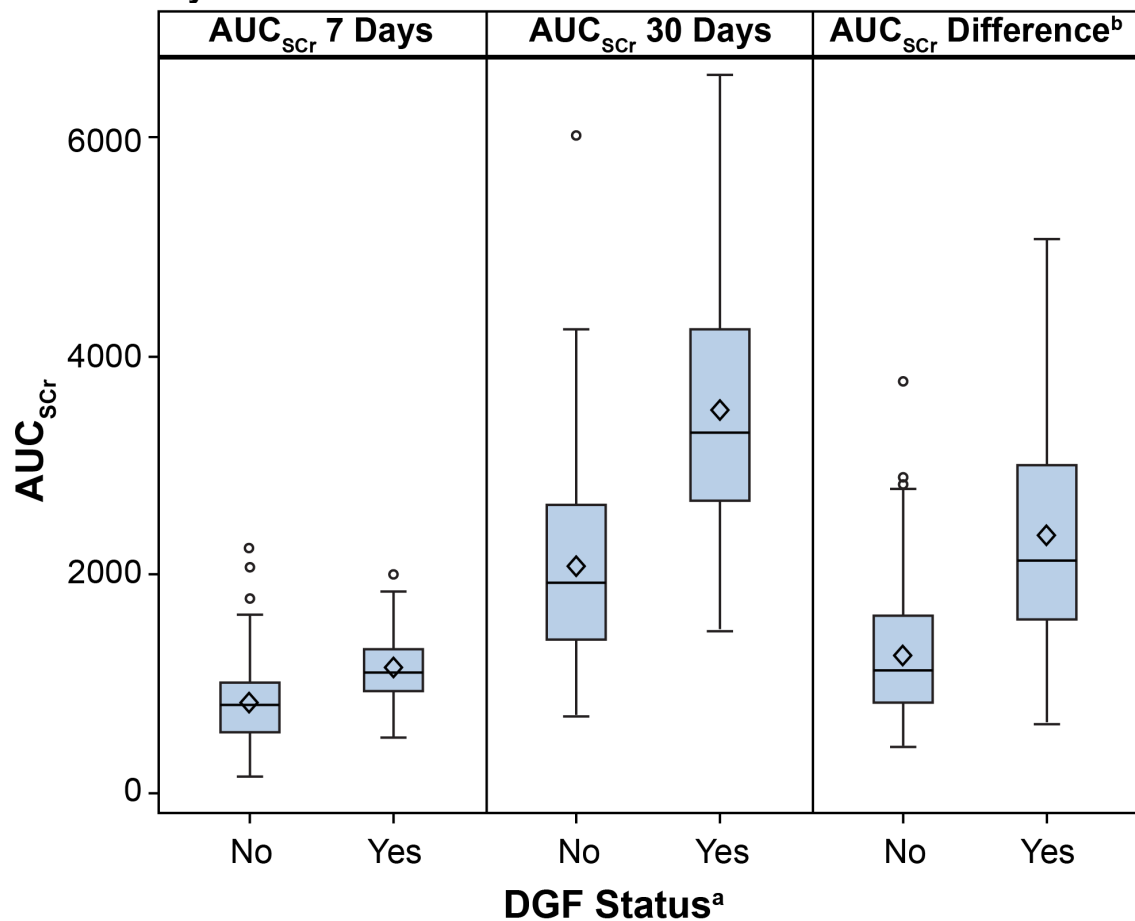

**Notes:** The diamond in each box indicates the group mean. The horizontal line inside the box is the median (50<sup>th</sup> percentile). The top and bottom borders of the box are the 25<sup>th</sup> and 75<sup>th</sup> percentiles respectively. The whiskers are calculated as ±1.5 interquartile range. Outliers are represented as small circles. <sup>a</sup> DGF status is according to physician chart review. <sup>b</sup> Difference between mean AUC<sub>scr</sub> at Day 7 and Day 30.

**Abbreviations:** AUC<sub>scr</sub>, serum creatinine area under the curve; DGF, delayed graft function.

Supplemental Figure 2 Longitudinal eGFR levels by days post-transplant over 1 year (mL/min/1.73 m<sup>2</sup>).

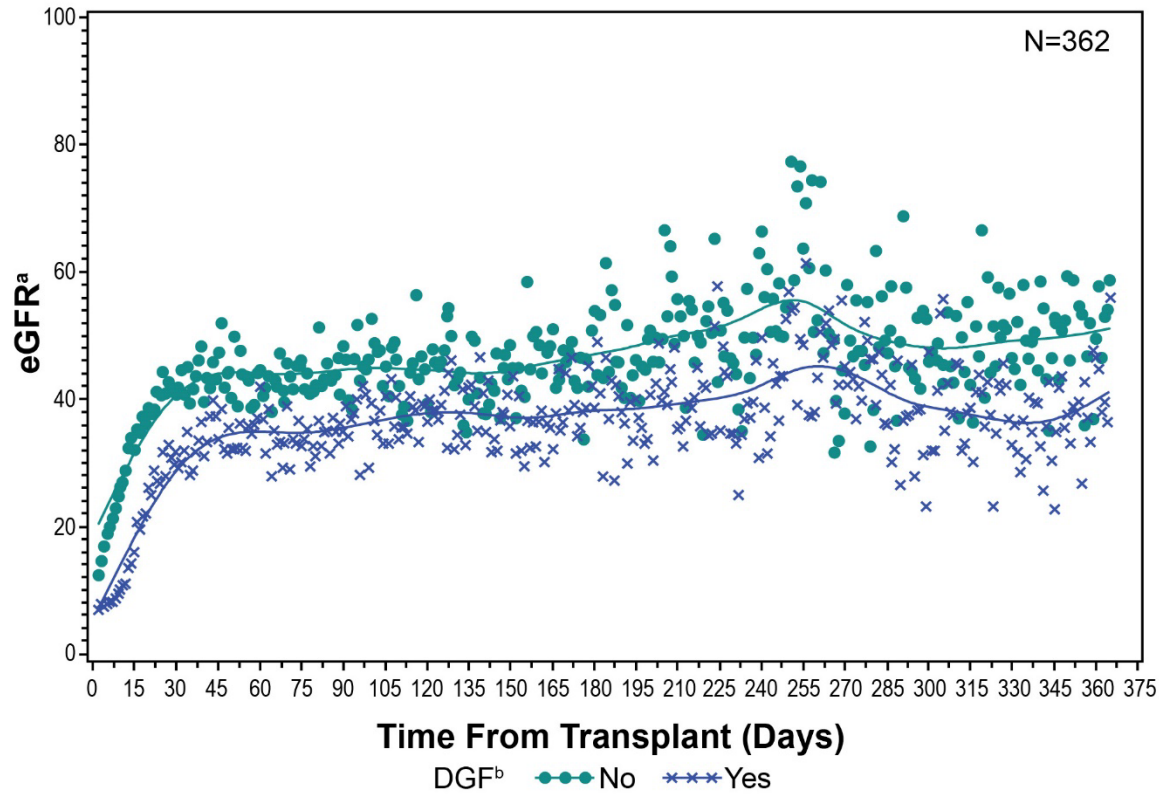

**Notes:** <sup>a</sup> eGFR is first averaged at patient level within a year post-transplant. Includes eGFR assessments at least 48 hours after the last day of dialysis. For patients without dialysis eGFR values are obtained from 48 hours post-transplant. <sup>b</sup> DGF status is according to chart review.

**Abbreviations:** DGF, delayed graft function; eGFR, estimated glomerular filtration rate.

**Supplemental Figure 3. Graft survival by DGF status according to 3-day functional definition. A. 1 year post-transplantation. B. 5 years post-transplantation.**

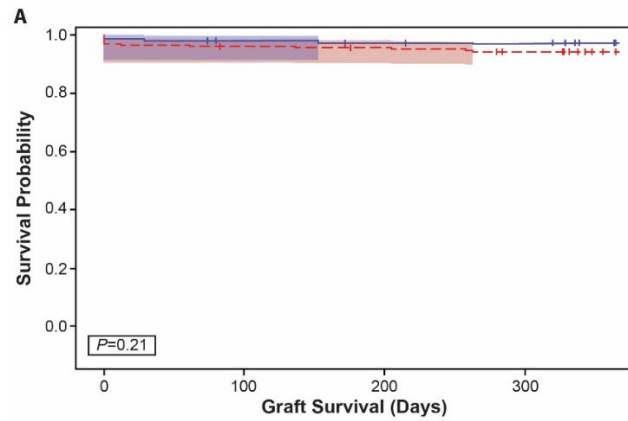

Number of Patients at Risk

|                     |     |     |     |     |
|---------------------|-----|-----|-----|-----|
| DGF <sup>a</sup>    | 224 | 213 | 211 | 206 |
| No DGF <sup>b</sup> | 138 | 133 | 131 | 130 |

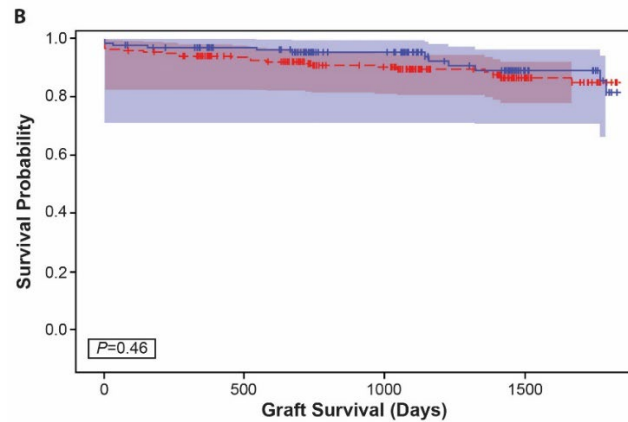

Number of Patients at Risk

|                     |     |     |     |    |
|---------------------|-----|-----|-----|----|
| DGF <sup>a</sup>    | 224 | 185 | 142 | 58 |
| No DGF <sup>b</sup> | 138 | 120 | 89  | 33 |

**Notes:** <sup>a</sup> DGF based on <10% fall in SCr versus baseline per 24 hours averaged over the first 72 hours with or without dialysis. <sup>b</sup> Includes patients with intermediate and immediate graft function.

**Abbreviations:** DGF, delayed graft function; SCr, serum creatinine.
